# Supplementary material
Source: HighWire-hosted journal article supplement (https://www.annfammed.org/highwire/filestream/8970/field_highwire_adjunct_files/0/Elmore_Supp_App.pdf)
Supplement: Elmore_Supp_App.pdf [file Elmore_Supp_App.pdf]

SUPPLEMENTAL MATERIALS FOR

Klein JW, Peacock S, Tsui JI, O'Neill SF, DesRoches CM, Elmore JG. Perceptions of primary care notes by patients with mental health diagnoses. *Ann Fam Med*. 2018;16(4):343-345.

Appendix 1.

List of ICD-9 codes used to identify mental health disorder diagnosis

| <b>Diagnosis</b>     | <b>ICD-9 code</b> | <b>Description</b>                                |
|----------------------|-------------------|---------------------------------------------------|
| Depression           | 296.2             | Major depression, single episode                  |
|                      | 296.3             | Major depression, recurrent episode               |
|                      | 311               | Depression, not otherwise specified               |
| Bipolar disorder     | V11.1             | Personal history of affective disorders           |
|                      | 296.0             | Manic disorder, single episode                    |
|                      | 296.1             | Manic disorder, recurrent episode                 |
|                      | 296.4             | Bipolar affective disorder, manic                 |
|                      | 296.5             | Bipolar affective disorder, depressed             |
|                      | 296.6             | Bipolar affective disorder, mixed                 |
|                      | 296.7             | Bipolar disorder, unspecified                     |
|                      | 296.8             | Manic-depressive psychosis, other and unspecified |
|                      | 296.9             | Other and unspecified affective psychoses         |
| Psychotic disorder   | V11.0             | Personal history of schizophrenia                 |
|                      | 295               | Schizophrenic disorders                           |
|                      | 297               | Paranoid states                                   |
|                      | 298               | Other nonorganic psychoses                        |
| Anxiety disorder     | 300               | Neurotic disorders                                |
| Stress disorder      | 308               | Acute reaction to stress                          |
|                      | 309               | Adjustment reaction                               |
| Personality disorder | 301               | Personality disorders                             |
